# Supplementary material for: Fundamentals of hydrogen production and use in a decarbonising power system
Source: Research Square preprint supplement (doi:10.21203/rs.3.rs-4924508/v1), 2024-08-23
Supplement: Supplementary file 1 [file 227030c2726437d3cfe11a1f.xlsx]

## Sheet: MAIN
	Below the battery sizes for the various scenarious are listed. The weblink to the Energy Transition Model environment is leading when assesing the scenario data.
	Each other tab includes the underlying data of a specific scenario.
	Scenario links
	Scenario						battery size to average renewable production ratio	Link
	Moleculen, Berenschot (2018)						0	https://pro.energytransitionmodel.com/scenarios/342557
	Elektronen, Berenschot (2018)						0.896078	https://pro.energytransitionmodel.com/scenarios/342558
	Regionaal, CE Delft (2017)						1.46068	https://pro.energytransitionmodel.com/scenarios/369649
	Nationaal, CE Delft (2017)						1.06979	https://pro.energytransitionmodel.com/scenarios/369650
	Internationaal, CE Delft (2017)						0.732295	https://pro.energytransitionmodel.com/scenarios/369651
	Generiek, CE Delft (2017)						0.535885	https://pro.energytransitionmodel.com/scenarios/369652
	Regionaal, Berenschot & Kalavasta (2020)						0.31709	https://pro.energytransitionmodel.com/saved_scenarios/9184
	Nationaal, Berenschot & Kalavasta (2020)						0.428884	https://pro.energytransitionmodel.com/saved_scenarios/9185
	Internationaal, Berenschot & Kalavasta (2020)						0.440638	https://pro.energytransitionmodel.com/saved_scenarios/9187
	Europese CO2-sturing, Berenschot & Kalavasta (2020)						0.457026	https://pro.energytransitionmodel.com/saved_scenarios/9186
	Verkenning 2050, Gasunie (2018)						0.731625	https://beta-pro.energytransitionmodel.com/scenarios/748145
	Quintel Intelligence (2015)						0	https://pro.energytransitionmodel.com/scenarios/423882
						Statistic	battery size to average renewable production ratio
						Average	0.589166
						Minimum	0
						10 percentile	0.031709
						Q1	0.345038
						Median	0.496456
						Q3	0.773241
						90 percentile	1.05242
						Maximum	1.46068
						Box 1	0.496456
						Box 2	0.276785
						Box 3	0.279179
						Whisker top	0.408265
						Whisker bottom	0.496456

## Sheet: Berenschot, moleculen
	Moleculen, Berenschot (2018)						https://pro.energytransitionmodel.com/scenarios/342557									Wind (EJ)	Solar (EJ)	Average Wind (MW)	Average solar (MW	Stand-alone and household batteries (MWh)	Batteries (MW)	Total Batteries (MW)	Batteries over renewables: b_p/r
	cases-elektronen_enof_moleculen_twee_transitiepaden_voor_een_co2-neutrale_toekomst.pdf (berenschot.nl)															0.02718	0.026	861.872	824.455	0	0	0	0

## Sheet: Berenschot, elektronen
	Elektronen, Berenschot (2018)						https://pro.energytransitionmodel.com/scenarios/342558									Wind (EJ)	Solar (EJ)	Average Wind (MW)	Average solar (MW)	Stand-alone and household batteries (MWh)	Batteries in vehicles (MW)	Total Batteries (MW)	Batteries over renewables: b_p/r
	cases-elektronen_enof_moleculen_twee_transitiepaden_voor_een_co2-neutrale_toekomst.pdf (berenschot.nl)															0.84	0.199	26636.2	6310.25	0	29522.6	29522.6	0.896078

## Sheet: CE Delft, nationaal
	Nationaal, CE Delft (2017)						https://pro.energytransitionmodel.com/scenarios/369650									Wind (EJ)	Solar (EJ)	Average Wind (MW)	Average solar (MW)	Stand-alone and household batteries (MWh)	Batteries in Vehicles (MW)	Total Batteries (MW)	Batteries over renewables: b_p/r
	CE_Delft_3L53_Net_voor_de_Toekomst_Zonder_BIJL.pdf															1.01	0.121	32026.9	3836.88	73755	19928	38366.8	1.06979

## Sheet: CE Delft, internationaal
	Internationaal, CE Delft (2017)						https://pro.energytransitionmodel.com/scenarios/369651									Wind (EJ)	Solar (EJ)	Average Wind (MW)	Average solar (MW)	Stand-alone and household batteries (MWh)	Batteries in vehicles (MW)	Total Batteries (MW)	Batteries over renewables: b_p/r
	CE_Delft_3L53_Net_voor_de_Toekomst_Zonder_BIJL.pdf															0.159	0.056	5041.86	1775.75	2258	4428	4992.5	0.732295

## Sheet: CE Delft, regionaal
	Regionaal, CE Delft (2017)						https://pro.energytransitionmodel.com/scenarios/369649									Wind (EJ)	Solar (EJ)	Average Wind (MW)	Average solar (MW	Stand-alone and household batteries (MWh)	Batteries in vehicles (MW)	Total Batteries (MW)	Batteries over renewables: b_p/r
	CE_Delft_3L53_Net_voor_de_Toekomst_Zonder_BIJL.pdf															0.605	0.303	19184.4	9608.07	73755	23618	42056.8	1.46068

## Sheet: CE Delft, generiek
	Generiek, CE Delft (2017)						https://pro.energytransitionmodel.com/scenarios/369652									Wind (EJ)	Solar (EJ)	Average Wind (MW)	Average solar (MW)	Stand-alone and household batteries (MWh)	Batteries in vehicles (MW)	Total Batteries (MW)	Batteries over renewables: b_p/r
	CE_Delft_3L53_Net_voor_de_Toekomst_Zonder_BIJL.pdf															0.113	0.06381	3583.21	2023.4	3162	2214	3004.5	0.535885

## Sheet: Ber. & Kalav., regionaal
	Regionaal, Berenschot & Kalavasta (2020)						https://pro.energytransitionmodel.com/saved_scenarios/9184									Wind (EJ)	Solar (EJ)	Average Wind (MW)	Average solar (MW)	Stand-alone and household batteries (MWh)	Batteries in vehicles (MW)	Total Batteries (MW)	Batteries over renewables: b_p/r
	rapport_klimaatneutrale_energiescenario_s_2050_2.pdf (berenschot.nl)								Original report with scenario definition							0.718	0.376	22767.6	11922.9	44000	0	11000	0.31709
	NetbeheerNL_Rapport-Energiesysteem_A4_FC.pdf (netbeheernederland.nl)								Contains updated values on batteries

## Sheet: Ber. & Kalav., nationaal
	Nationaal, Berenschot & Kalavasta (2020)						https://pro.energytransitionmodel.com/saved_scenarios/9185									Wind (EJ)	Solar (EJ)	Average Wind (MW)	Average solar (MW)	Stand-alone and household batteries (MWh)	Batteries in Vehicles (MW)	Total Batteries (MW)	Batteries over renewables: b_p/r
	rapport_klimaatneutrale_energiescenario_s_2050_2.pdf (berenschot.nl)								Original report with scenario definition							1.05	0.32	33295.3	10147.1	74527	0	18631.8	0.428884
	NetbeheerNL_Rapport-Energiesysteem_A4_FC.pdf (netbeheernederland.nl)								Contains updated values on batteries

## Sheet: Ber. & Kalav., internationaal
	Internationaal, Berenschot & Kalavasta (2020)						https://pro.energytransitionmodel.com/saved_scenarios/9187									Wind (EJ)	Solar (EJ)	Average Wind (MW)	Average solar (MW)	Stand-alone and household batteries (MWh)	Batteries in Vehicles (MW)	Total Batteries (MW)	Batteries over renewables: b_p/r
	rapport_klimaatneutrale_energiescenario_s_2050_2.pdf (berenschot.nl)								Original report with scenario definition							0.554	0.156	17567.2	4946.73	39682	0	9920.5	0.440638
	NetbeheerNL_Rapport-Energiesysteem_A4_FC.pdf (netbeheernederland.nl)								Contains updated values on batteries

[truncated: 3 more sheets: Ber. & Kalav., europese sturing, Gasunie, verkenning 2050,  Quintel Intelligence (2015)]
